# Supplementary material for: Serum IL-27 levels increase in subjects with hypothyroidism and are negatively correlated with the occurrence of nonalcoholic fatty liver disease
Source: Front Endocrinol (Lausanne). 2023 Aug 2;14:1173826. doi: 10.3389/fendo.2023.1173826 (PMC10433777; doi:10.3389/fendo.2023.1173826)
Supplement: Supplementary file 1 [file DataSheet_1.xlsx]

## Sheet: Data
Name	Group	NAFLD	age	Gender	Height	Weight	BMI	IL-27	Visceralfat	Subcutaneousfat	s-TSH	FT3	FT4	ALT	AST	GGT	FBG	TC	TG	HDLC	LDLC	HOMARI3
Si Chen	Hypothyroidism	N	35	F	162.5	56.8	21.5	128.23	13	65	73.29	1.91	0.62	23	29	29	4	6.3	1.69	2.21	3.06	0.37
Zhen Guo	Hypothyroidism	N	27	F	161.5	53.2	20.4	133.56	22	163	74.76	2.45	0.54	12	20	11	4.59	4.9	0.9	1.89	2.77	1.7
Hai Sun	Hypothyroidism	N	46	F	155.5	39.4	16.3	139.53	25	40	104.89	2.21	0.47	11	13	8	4.16	5.54	0.63	2.05	3.1	0.35
Wang	Hypothyroidism	N	35	F	160	49.7	19.4	135.57	27	144	105.31	2.26	0.77	11	16	11	4.46	5.13	0.62	2.04	2.89	0.69
Li Wu	Hypothyroidism	N	40	F	159	58.1	23	119.92	27	191	150	1.66	0.43	14	19	7	4.4	7.47	1.61	1.55	5.26	1.63
Yuan	Hypothyroidism	N	47	M	159	58.7	23.2	118.79	30	173	111.48	2	0.61	20	20	35	4.84	5.17	0.72	1.79	2.94	0.95
Jie Zhang	Hypothyroidism	N	36	F	163	56.3	21.2	131.35	30	145	17.74	1.2	0.15	17	23	12	4.15	6.01	1.47	1.56	4.33	1.27
Yuan Tian	Hypothyroidism	N	39	F	152.5	49.4	21.1	131.36	31	131	9.27	2.86	0.98	13	20	13	4.51	5.71	1.28	2.12	3.04	1.67
Xin He	Hypothyroidism	N	23	F	168	51.2	18.1	109.01	32	83	0.39	2.97	1.22	10	13	9	4.09	3.2	0.79	1.12	1.53	1.51
Ma	Hypothyroidism	N	33	F	164.5	54.3	20.1	156.2	34	160	18.66	3.12	0.81	13	23	9	4.29	4.52	0.6	1.74	2.66	0.48
Zhou	Hypothyroidism	N	36	F	160.5	52.3	20.3	119.13	36	126		2.23	0.57	10	22	10	5.21	4.64	0.91	1.71	2.04	1.83
Li	Hypothyroidism	N	35	F	160	49.7	19.4	139.8	27	144	105.31	2.26	0.77	11	16	11	4.46	5.13	0.62	2.04	2.89	0.69
Lu	Hypothyroidism	N	40	F	176	56.5	18.2	118.04	38	142	35.22	3.08	0.67	11	14	16	4.24	5.04	0.6	1.8	3.04	1.38
Qin Wang	Hypothyroidism	N	45	F	154	59.9	25.3	103.28	39	225	15.92	2.7	0.65	27	25	14	4.56	5.82	1.04	1.76	3.88	1.68
Liu	Hypothyroidism	N	34	F	162.5	53.5	20.3	137.49	43	111	82.68	0.65	0.1	62	55	48	3.94	8.16	1.6	2.88	4.51	0.93
Shi	Hypothyroidism	N	35	F	160	49.7	19.4	129.68	27	144	105.31	2.26	0.77	11	16	11	4.46	5.13	0.62	2.04	2.89	0.69
Min Deng	Hypothyroidism	N	30	F	155.5	48.5	20.1	132.38	43	87	135.39	0.39	0.1	67	60	25	4.34	6.22	1.02	1.79	4.52	1.6
Liu	Hypothyroidism	N	38	F	164.5	44.2	16.3	138.84	45	66	8.34	2.47	0.87	44	95	322	4.01	5.59	3.28			0.45
Ying Shi	Hypothyroidism	N	54	F	158.5	58.5	23.4	126.58	45	170	5.28	2.97	1.3	25	23	14	4.51	4.78	0.73	1.64	2.76	1.67
Xiao Wang	Hypothyroidism	N	67	F	159	50.9	20.1	133.19	50	128	6.23	2.67	1.51	12	15	12	4.69	4.79	0.73	1.79	2.6	1.23
Yu Yang	Hypothyroidism	N	62	F	151.5	60	26.1	136.38	51	303	3.12	3.01	1.3	26	25	23	4.59	6.91	3.97	1.41	3.22	1.7
MeiJiang	Hypothyroidism	N	36	F	158	55.9	22.4	121.79	52	151	85.35	2.54	0.72	95	91	14	4.54	5.33	0.82	1.42	3.68	0.93
Na Zu	Hypothyroidism	N	32	F	168.5	68.5	24.1	131.39	53	270												1.73
Shang	Hypothyroidism	N	36	F	164	64.4	23.9	67.25	54	139	81			11	15	6	4.25	6.19	1.03	1.68	4.39	0.83
Jian Liu	Hypothyroidism	N	46	F	173.5	75.2	25	99.31	56	234	36.53	2.27	0.75	16	19	15		4.95	4.82	1.68	2.88	1.73
Li Cheng	Hypothyroidism	N	59	F	166.5	61.6	22.2	130.23	59	167	0.56	3.6	1.73	23	28	12	4.48	5.38	2.12	1.14	3.12	0.94
Ning Zhang	Hypothyroidism	N	29	F	166.5	55.3	19.9	32.57	59	123		1.41	0.22	38	34	19	4.28	6.58	1.71	1.8	3.82	1.03
Jin Zhao	Hypothyroidism	N	42	M	179.5	78.5	24.4	122.35	63	155	4.35	3.37	1.46	31	24	18	5.14	6.36	1.57	1.12	4.5	1.9
Lu	Hypothyroidism	N	31	F	170	68.6	23.7	133.91	68	209	2.31	0.96	0.21	37	69	24	3.75	10.14	1.84	2.83	7.2	1.62
Liang	Hypothyroidism	N	46	F	164	70	26	118.33	72	236	77.11	1.53	0.23	12	22	11	4.48	6.81	0.92	2.04	4.3	0.84
Su Guan	Hypothyroidism	N	64	F	157	66.7	27.1	156.21	72	277	89.97	1.95	0.61									1.73
Jin Ma	Hypothyroidism	N	49	F	162.5	65.3	24.7	6.59	72	145	1.65	2.64	1.14	34	26	24	6.85	4.31	0.73	1.46	2.34	2.53
Li	Hypothyroidism	N	53	M	166.5	58.6	21.1	129.64	72.5	96.5	126.6	2.94	0.64	18	17	16	4.31	5.66	1.55	1.38	3.6	0.92
Zhao	Hypothyroidism	N	42	F	160	71.8	28	178.39	75	279	10	2.92	0.77	39	32	59	4.1	4.55	0.79	1.57	2.95	1.29
Yan Dou	Hypothyroidism	N	46	F	154	55.1	23.2	129.56	77	153	18.05	2.27	0.77									1.73
Li Zhu	Hypothyroidism	N	44	F	153.5	62.5	26.5	101.26	82	171	20.5	3.69	0.72	12	14	12	4.46	4.97	1.63	1.18	3.34	2.52
Bao	Hypothyroidism	N	65	F	156	64.5	26.5	130.16	84	220	180.4	3.31	4.7	48	42	197	1.7	6.56	1.42	2	3.79	0.66
Ji Du	Hypothyroidism	N	51	F	160.5	65.3	25.3	119.37	85	186	48.73	2.5	0.52	19	24	10	4.89	5.52	0.59	1.96	3.45	1.81
Wei Zheng	Hypothyroidism	N	61	F	181.5	69.5	21.1	131.35	85	221	69.12	2.06	0.57	14	20	18	4.79	5.1	0.81	1.97	2.52	1.77
Hong Yu	Hypothyroidism	N	54	F	156.5	59.1	24.1	189.73	86	196	110.52	2.18	0.39	34	30	20	5.12	5.68	1.59	1.41	3.57	1.87
Rui Zhou	Hypothyroidism	N	29	F	158	71.1	28.5	113.95	86	299	27.1	2.8	0.72	42	28	29	5.14	2.52	0.91	1.02	3.4	1.9
Xuan Bao	Hypothyroidism	N	53	M	165.5	71.8	26.2	110.54	86	175		1.56	0.16	16	26	25	4.59	5.66	1.48	1.45	2.98	1.7
Lu	Hypothyroidism	N	53	F	162	68.1	25.9	121.71	87	224	142.63	0	0.1	27	52	20	4.17	7.49	2.09	1.79	4.92	1.2
Shu Hu	Hypothyroidism	N	49	M	163.5	72	26.9	180.63	87	198	70.97	0.86	0.17	76	60	362	5.27	5.06	2.1	1.38	1.49	1.31
Fu Shu	Hypothyroidism	N	35	M	166.5	79.3	28.6	125.21	89	249	47.9	1.86	0.53	26	16	70	4.89	4.69	2.44	1.06	2.44	1.81
Li Fan	Hypothyroidism	N	47	F	154.5	62	26	7.69	92	179	9	2.97	0.8	14	14	6	5.18	3.93	0.71	1.11	2.49	1.91
Zhang	Hypothyroidism	N	32	M	187.5	83.9	23.9	130.24	93	176		2.25	0.53	28	18	17	4.54	4.38	0.93	1.46	2.69	1.94
Jia Gao	Hypothyroidism	N	31	M	184.5	86.5	25.4	166.79	95	228	29.02	3.3	1.04	19	18	14	4.87	7.76	2.54	1.15	5.29	1.8
Huang	Hypothyroidism	Y	51	F	159	58.7	23.2	13.65	44	140	63.13	2.19	0.38	15	17	15	4.93	6.65	1.53	1.7	4.48	1.18
Yu Ma	Hypothyroidism	Y	32	F	160	60	23.4	17.23	62	179	67.73	2.27	0.49	17	20	12	4.79	5.8	1.55	1.52	4.05	2.64
Zhuang	Hypothyroidism	Y	48	F	155.5	67.6	28	198.2	66	279	15.32	3.4	0.79	26	37	18	5.86	4.83	1.03	1.63	2.7	3.26
Mei Sun	Hypothyroidism	Y	47	F	157	64.1	26	35.23	77	174	63.43	1.33	0.26	12	25	27	6.43	4.83	3.26	1.25	2.16	3.94
He Zong	Hypothyroidism	Y	55	F	167	80	28.7	9.62	79	305	1.12	3.11	1.44	8	15	10	5.53	4.06	0.67	1.02	3.02	3.1
Yang	Hypothyroidism	Y	29	F	154.5	73.7	30.9	19.06	86	245		0.4	0.16	18	25	22	4.09	6.82	1.29	1.68	4.71	2.91
Ning	Hypothyroidism	Y	71	F	152.5	59.3	25.5	1.92	91	244	122.35	1.84	0.6	32	25	14	6.51	8.33	1.67	1.35	6.22	2.8
Bao Qian	Hypothyroidism	Y	58	M	182.5	86.4	25.9	9.57	92	200	94.04	1.26	0.33	50	43	46	4.2	7.97	1.98	1.13	4.9	1.55
Da Wang	Hypothyroidism	Y	50	F	170.5	73.9	25.4	16.78	92.4	98.6	51.82	2.77	0.63	52	25	33	5.31	6.27	2.02	1.19	4.08	1.63
Chen	Hypothyroidism	Y	41	F	154	64.2	27.1	76.88	94	255	60.03	0.92	0.23	42	32		5.4	6.1	1.31			1.99
Qi	Hypothyroidism	Y	41	F	173	85.7	28.6	13.11	94	231	106.75	2.58	0.72	18	16	12	4.73	6.08	0.77	1.47	4.33	1.74
Chun Zhang	Hypothyroidism	Y	66	F	150	58.2	25.9	13.32	101	235	3.99	2.83	1.46	19	20	14	5.11	3.66	2.62	1.41	1.65	1.89
Wang	Hypothyroidism	N	32	M	187.5	83.9	23.9	126.24	93	176		2.25	0.53	28	18	17	4.54	4.38	0.93	1.46	2.69	1.94
Chen	Hypothyroidism	Y	63	M	162	65.8	25.1	123.68	105	241		2.11	0.4	22	25	29	4.38	5.37	1.63	1.27	4.19	1.28
Qin Yu	Hypothyroidism	Y	50	F	161	73.4	28.7	10.57	108	236												1.73
Xu Shu	Hypothyroidism	Y	58	F	157	76.1	30.9	7.78	109	303												2.73
Jin Chen	Hypothyroidism	Y	58	F	165	76.5	28.1	15.37	112	316	7.79	3.17	0.87	17	22	15	4.34	4.18	0.94	1.36	2.61	1.6
Chun Wang	Hypothyroidism	Y	31	F	168.5	93	32.8	10.56	113	269	11.53	2.86	0.81	23	26	31	3.7	3.99	2.26	0.78	2.53	2.37
Huang	Hypothyroidism	Y	47	F	152	70.4	30.5	13.74	114	300	111.48	0.67	0.19	37	40	23	4.74	7.87	1.66	2.5	3.03	1.14
Qin	Hypothyroidism	Y	57	F	159.5	66.3	26.1	23.56	121	230	12.07	3.17	0.88	27	46	78	5.91	3.78	1.58	1.27	2.14	2.84
Ze Jia	Hypothyroidism	Y	52	M	164.5	75.7	28	7.63	124	212												2.73
Jun Li	Hypothyroidism	Y	40	M	181	95.2	29.1	7.62	127	296		2.49	0.58	20	21	43	4.34	5.93	2.76	1.03	4.3	3.6
Zhang	Hypothyroidism	Y	50	M	169.5	86.2	30	19.24	131	239	15.24	3.34	0.86	81	39	39	5.2	6.01	2	1.24	3.92	1.92
Ma	Hypothyroidism	Y	71	F	152.5	59.3	25.5	3.91	91	244	122.35	1.84	0.6	32	25	14	6.51	8.33	1.67	1.35	6.22	2.8
Wen Liu	Hypothyroidism	Y	46	M	169.5	91.9	32	9.76	135	244	69.19	3.08	0.89	10	19	21	4.44	4.93	1.92	1.03	3.17	2.33
Xiu Yang	Hypothyroidism	Y	68	F	155	76.1	31.7	11.23	150	253	139.79	2	0.42	33	31	46	5.31	5.59	3.41	0.85	3.82	2.96
Qiang Gao	Hypothyroidism	Y	58	M	174.5	98.4	32.3	16.57	167	323												3.73
Li Li	Hypothyroidism	Y	40	F	155.5	97.7	40.4	9.55	179	330	5.08	2.88	1.34	26	22	24	5.23	4.1	1.7	0.89	2.69	2.91
Dong Liu	Hypothyroidism	Y	41	M	171	99.6	34.1	7.68	196	311	67.91	2.78	0.92									3.23
Gao	Subclinical hypothyroidism	N	37	F	166.5	65	23.4	156.93	16	178	6.09	3.45	1.48	15	15	8	4.53	5.35	1.77	2.59	2.22	0.95
Ying Zhang	Subclinical hypothyroidism	N	32	F	158	47.3	18.9	262.03	17	78	5.5	3.44	1.3	12	17	11	4.74	4.66	0.72	1.29	3.2	1.62
Sun	Subclinical hypothyroidism	N	55	F	153	48.8	20.8	162.21	17	178	9.59	1.93	0.69	19	22	12	5.93	3.25	0.69	1	1.85	1.43
Yu Su	Subclinical hypothyroidism	N	26	F	159	52.4	20.7	133.83	22	178	4.81	3.38	1.13	14	18	15	3.75	3.63	0.97	1.51	2.08	1.93
Chen Zheng	Subclinical hypothyroidism	N	37	F	155.5	46.1	19.1	214.58	25	166	6.18	3.52	1.25	19	22	14	4.18	4.78	0.74	2.19	2.58	1.3
Xu Jing	Subclinical hypothyroidism	N	33	F	160	46.4	18.1	162.12	29	126	6.25	3.54	1.29	10	16	12	4.43	4.57	0.88	1.51	3.03	0.65
Xiao Shi	Subclinical hypothyroidism	N	24	F	177.5	63.3	20.1	300	31	196	14.95	3.17	1.16	14	17	11	4.31	6.67	1.28	1.45	4.5	1.59
Yu Qin	Subclinical hypothyroidism	N	55	F	165	59.7	21.9	27.31	33	223	6.37	2.91	1	17	21	10	4.14	4.18	1.47	1.34	2.49	0.46
Zeng	Subclinical hypothyroidism	N	29	M	163.5	69.5	26	139.79	37	289	4.82	2.78	1.23	19	20	15	4.67	5.75	1.72	1.06	4.12	1.87
Xiao Zhang	Subclinical hypothyroidism	N	29	F	163	52.8	19.9	127.44	41	136	6.75	3.39	1.13	9	17	16	4.9	3.3	1.15	0.99	1.96	1.81
Jing Geng	Subclinical hypothyroidism	N	35	F	165.5	54.5	19.9	126.83	42	175	6.48	3.4	1.12	14	21	11	4.21	4.87	0.66	1.58	2.74	0.97
Gao	Subclinical hypothyroidism	N	51	F	151.5	51.9	22.6	118.33	42	170	126.12	0.46	0.15	46	59	18	4.87	8.83	1.77	2.48	5.09	0.52
Li Sun	Subclinical hypothyroidism	N	28	F	159	50.8	20.1	152.64	43	116	20.8	3.1	0.96	19	26	17	3.75	4.3	1.42	1.58	2.06	0.42
Yi Luan	Subclinical hypothyroidism	N	28	F	161.5	72.1	27.6	116.25	43	201	7.06	3.24	1.19	13	17	12	5.1	3.38	0.45	1.66	1.32	1.75
Mei Chen	Subclinical hypothyroidism	N	40	F	163	56.4	21.2	9	46	143	14.17	2.38	0.98	6	15	8	4.3	1.79	0.85	1.79	2.79	0.69
Zheng	Subclinical hypothyroidism	N	48	F	158.5	51.3	20.4	173.28	46	161	5.54	2.77	0.9	10	14	8	4.62	4.91	0.68	1.72	2.93	0.82
Jiang	Subclinical hypothyroidism	N	32	F	158	47.3	18.9	118	17	78	5.5	3.44	1.3	12	17	11	4.74	4.66	0.72	1.29	3.2	1.62
Xue Wei	Subclinical hypothyroidism	N	53	F	156	58.5	24	159.55	48	172	0.02	5.28	1.74	56	45	13	4.29	4.61	0.95	1.47	2.74	1.58
Jin He	Subclinical hypothyroidism	N	33	F	155	59.3	24.7	116.27	49	171	5.15	3.53	1.13	13.3	18.9	10.1	5.61	4.22	1.25	1.08	2.1	2.07
Feng Li	Subclinical hypothyroidism	N	62	F	157.5	53.7	21.6	6.95	54	186	9.95	3.41	0.93	8.8	20	11.2	5.42	4.99	1.05	1.48	2.76	2
Guo	Subclinical hypothyroidism	N	24	F	177.5	63.3	20.1	111	31	196	14.95	3.17	1.16	14	17	11	4.31	6.67	1.28	1.45	4.5	1.59
Yan Liu	Subclinical hypothyroidism	N	52	F	163.5	68	25.4	137.07	54	273	5.94	2.97	1.26									1.38
Hao	Subclinical hypothyroidism	N	42	F	165.5	63	23	13.87	62	270	5.22	3.5	1.1	35	38	19	5.78	6.26	2.18	1.31	4.3	2.36
Qiao Wang	Subclinical hypothyroidism	N	59	F	157	62.5	25.4	171.75	70	244	11.43	3.21	0.97	31	28	17	4.53	5.52	2.36	1.02	3.54	2.84
Dan Liu	Subclinical hypothyroidism	N	40	F	167.5	65.4	23.3	132	75	135	6.24	2.89	0.98	27	20	15	4.11	4.3	1.68	1.13	2.58	1.92
Jia Wu	Subclinical hypothyroidism	N	34	F	162	76.8	29.3	24.77	76	298	4.97	3.27	0.99	16	18	57	5.18	5.51	1.06	1.43	3.96	1.77
Shu Yang	Subclinical hypothyroidism	N	62	F	165	66.6	24.5	13.35	77	198	10.58	2.52	0.98	18	22	18	4.96	7.35	1.59	1.5	4.74	1.83
Wu	Subclinical hypothyroidism	N	58	F	154	53.8	22.7	110.32	84	172	9.96	3.15	1.15	30	35	34	5.82	3.97	3.67	0.9	0.99	1.39
Jing Fang	Subclinical hypothyroidism	N	45	F	164	68.2	25.4	131.43	88	97.5	4.87	3.09	1.09	30	27	12	4.7	7.18	2.31	1.17	4.85	1.5
Dan Ma	Subclinical hypothyroidism	N	41	F	164	50.6	18.8	110.01	95	399	9.95	2.98	1.15	7	18	19	4.26	3.91	0.83	1.18	2.58	0.93
Meng Cai	Subclinical hypothyroidism	Y	50	F	170	60.4	20.9	39.25	55	181	6.57	2.9	0.99	18	22	25	4.22	5.02	0.69	1.6	3.41	3.54
Hong Jin	Subclinical hypothyroidism	Y	51	F	165	68.6	25.2	14.86	66	158	7.04	2.43	0.97	29	24	32	5.14	6.44	2.28	1.53	4.64	4.73
Chen Cai	Subclinical hypothyroidism	Y	40	F	167	78.9	28.3	26.46	80	269	3.56	3.49	1.24	13	14	21	5.25	4.15	0.99	1.35	2.41	3.36
Sun	Subclinical hypothyroidism	Y	31	F	168.5	73.9	26	11.68	82	260	12.74	3.19	1.1	21	20	20	5.09	6.48	2.26	1.18	5.07	2.77
Ying Wu	Subclinical hypothyroidism	Y	63	F	157.5	57.6	23.2	37.63	85	210	6.48	2.99	1.13	25	23	22	4.53	5.25	4.12	1.09	2.47	3.12
Sheng Jia	Subclinical hypothyroidism	Y	38	M	170	71.9	24.9	10.5	92	245	5.36	3.94	1.5	38	29	37	5.75	6	2.49	1.12	4.6	2.58
Shu Li	Subclinical hypothyroidism	Y	72	F	155	57.1	23.81	9.7	94	135	7.52	3.5	1.14	13	20	35	5.09	5.12	2.07	1.16	3.34	3.1
Yue Liu	Subclinical hypothyroidism	Y	47	F	161.5	60.4	23.2	24.66	96	196	49.1	2.55	0.91	40	26	35	4.92	7.69	4.4	1	4.64	1.82
Hong Wu	Subclinical hypothyroidism	Y	41	F	153	75.1	32.1	7.12	98	299	11.44	3.4	1.11	13	27	24	3.93	3.99	1.6	1.33	1.76	1.82
Peng Zhang	Subclinical hypothyroidism	Y	34	M	171.5	66.8	22.7	28.69	100	192	6.95	3.63	1.42	15	20	19	4.93	4.22	1.63	0.76	2.69	1.82
Peng Wang	Subclinical hypothyroidism	Y	48	F	162.5	62.9	23.8	127.93	107	142	8.03	3.5	1.23	51	32	34	6.42	8.39	2.69	1.12	6.97	6.05
Zhao	Subclinical hypothyroidism	N	55	F	165	59.7	21.9	22.34	33	223	6.37	2.91	1	17	21	10	4.14	4.18	1.47	1.34	2.49	0.46
Feng	Subclinical hypothyroidism	Y	58	F	160.5	78.7	30.6	11.35	119	331	6.21	3.45	1.33				5.29	4.11	1.37	1.34	2.21	2.71
Bo Zhao	Subclinical hypothyroidism	Y	33	M	170.5	90.5	31.1	12.56	127	306	5.29	3.98	1.33	79	39	62	4.12	5.38	1.64	1.16	3.91	4.07
Zhou	Subclinical hypothyroidism	N	62	F	165	66.6	24.5	13.46	77	198	10.58	2.52	0.98	18	22	18	4.96	7.35	1.59	1.5	4.74	1.83
Sun	Subclinical hypothyroidism	Y	33	M	179.5	92.2	28.6	15.23	148	270	12.54	3.36	1.27	20	22	25	5.1	4.53	1.12	1.36	2.88	2.98
Song	Subclinical hypothyroidism	N	35	F	165.5	54.5	19.9	119.87	42	175	6.48	3.4	1.12	14	21	11	4.21	4.87	0.66	1.58	2.74	0.97
Li Shao	Subclinical hypothyroidism	Y	52	F	159	85.9	34	11.16	167	327	5.55	2.94	1.21	28	24	13	3.88	4.59	1.35	1.83	2.59	1.81
Xing	Subclinical hypothyroidism	Y	52	F	158	88.7	35.5	10.27	170	358	5.32	3.26	1.1	19	21	24	6.65	5.2	2.04	1.49	3.49	3.36
Xiao Yin	Subclinical hypothyroidism	Y	72	M	173.5	88.5	29.4	6.96	227	221	10.34	2.77	0.98	32	31	15	4.92	4.69	1.14	0.98	3.23	2.27
Zhi Wang	Euthyroidism	N	70	F	156.5	60.6	24.7	11.35	83	92.1	2.68	3.02	1.63				5.31	5.29	1.45	1.34	3.61	1.66201
Ying Ma	Euthyroidism	N	32	F	170	69	23.9	5.92	25	356	1.85	3.3	1.5	14	18	14	3.99	5.29	0.95	1.83	3.38	2.70183
Ma	Subclinical hypothyroidism	Y	34	M	171.5	66.8	22.7	22.6	100	192	6.95	3.63	1.42	15	20	19	4.93	4.22	1.63	0.76	2.69	1.82
Shen	Subclinical hypothyroidism	Y	40	F	167	78.9	28.3	22.39	80	269	3.56	3.49	1.24	13	14	21	5.25	4.15	0.99	1.35	2.41	3.36
Chun Dong	Euthyroidism	N	41	F	165.5	54.2	19.8	33.05	32	129	2.41	3.26	1.35	12	17	13	4.57	3.8	0.93	1.08	2.23	1.94646
Chao Chen	Euthyroidism	N	36	M	156	61.8	25.4	30.74	59	184	2.5	3.43	1.18	18.57	23.56	14.45	5.06	4.92	0.74	1.63	2.63	2.37236
Da Guo	Euthyroidism	N	39	F	162.5	49.2	18.6	9.28	5	175	3.49	3.64	1.46	11	17	18	4.7	6.1	1.41	1.52	4.24	2.0401
Yun Feng	Euthyroidism	N	40	F	161.5	50.3	19.3	2.32	48	122	2.72	3.12	1.24	10	13	7	4.84	4.23	0.64	1.46	2.56	2.191
Qiu Yang	Euthyroidism	N	46	F	166	76	27.6	236.33	60	266	2.9	3.43	1.44	12	18	12	4.65	3.56	1.14	1.43	1.26	1.83485
Jin Jin	Euthyroidism	N	27	F	162.5	66.4	25.1	57.23	39	259	4.42	3.5	1.12	11	18	9	4.83	5.12	0.83	1.59	3.17	1.44781
Bing Zhang	Euthyroidism	N	44	F	158.5	68.8	27.4	31.75	76	256	2.42	3.64	1.52	18	20	21	4.48	4.58	0.62	1.41	2.67	2.32868
Jie Yang	Euthyroidism	N	32	F	160	45.5	17.8	61.43	20	69	1.82	3.19	1.16	10	20	6	4.7	4.12	1.18	1.25	2.18	2.18879
Shuang Wang	Euthyroidism	N	37	F	162.5	68.1	25.8	94.95	50	253	1.92	3.72	1.32	16	15	19	4.67	3.84	1.2	1.31	2.15	1.80025
Yan Song	Euthyroidism	N	35	F	162	62.8	23.9	162.9	47	215	1.75	3.14	1.09	15	20	10	4.17	5.71	0.86	2.18	2.97	1.69099
Xin Liang	Euthyroidism	N	33	F	169.5	62.8	21.9	4.57	41	208	2.31	3.59	1.26	11	18	10	4.46	5.26	0.98	1.88	2.87	1.30066
Bing Chen	Euthyroidism	N	43	F	154	63	26.6	4.09	72	248	2.95	3.05	1.08	18	20	21	4.6	5.6	2.46	1.14	3.49	1.7051
Xiao Cheng	Euthyroidism	N	38	F	158	54.6	21.9	85.47	70	130	3.82	3.02	1.15	11	19	10	5.19	3.91	1.4	1.38	2.17	2.00467
Wu	Subclinical hypothyroidism	Y	47	F	161.5	60.4	23.2	96.78	96	196	49.1	2.55	0.91	40	26	35	4.92	7.69	4.4	1	4.64	1.82
Li Zhang	Euthyroidism	N	33	F	161	62.6	24.2	8.6	71	267	1.55	3.02	1.14	13	20	23	4.73	4.62	1.92	1.38	2.25	1.30193
Gang Du	Euthyroidism	N	39	F	173	78.7	26.3	80	119	220	1.42	3.85	1.21									2.23113
Xiao Ma	Euthyroidism	N	38	F	163.5	56.5	21.1	33.72	21	113	1.18	2.47	1.12									1.55417
Kun Zhang	Euthyroidism	N	35	F	168	52.2	18.5	2.83	38	105	2.39	3.11	1.04	16	23	10	4.04	4.87	0.83	1.52	2.61	2.13222
Xiang Qi	Euthyroidism	N	36	F	155	42.4	17.6	4	37	65	0.65	3.26	1.12	17	24	14	3.71	4.15	0.64	1.72	1.83	1.755
Yu Zhang	Euthyroidism	N	37	F	164.5	57.5	21.1	2.39	54	113	0.97	2.97	1.31	14	21	16	4.17	4.67	1.28	1.91	2.4	2.05865
Qi Niu	Euthyroidism	N	40	F	166.5	65.9	23.8	10.57	67	188	2.02	3.37	1.14	12	13	20	5.15	4.77	0.87	1.79	2.65	2.35389
Lin Zhang	Euthyroidism	N	38	F	164.5	53.9	19.9	3.07	43	120	4.7	3.81	1.2	20	26	22	4.76	5.8	1.47	1.91	3.57	0.916071
Ting Zheng	Euthyroidism	N	38	F	154	64.5	27.2	9.56	64	333	3.74	3.38	8.9	27	26	29	4.98	4.97	1.06	1.5	3.09	2.24256
Ya Bao	Euthyroidism	N	51	F	171.5	72.9	24.8	3.61	53	185	1.67	2.76	1.15	30	34	33	4.82	7	1.05	1.98	4.78	1.81601
Ying Cui	Euthyroidism	N	40	F	163	58.8	22.1	64.16	37	158	3	3.38	1.09	21	23	13	3.76	5.23	0.96	1.39	3.28	1.44902
Yu Gao	Euthyroidism	N	35	F	181.5	59.7	18.1	5.95	48	71	1.94	3.57	1.25	18	17	12	4.37	4.99	1.1	1.22	3.74	1.63684
Bao Hu	Euthyroidism	N	43	F	157.5	57.6	23.2	17.88	73	186	0.98	3.1	1.05	11	15	13	4.22	3.46	0.93	1.34	1.93	1.55713
Yi Zhou	Euthyroidism	N	38	F	169	71.1	24.9	15.83	59	284	2.36	3.06	1.31	12	16	22	4.56	3.97	1.45	1.2	2.45	1.35276
Xiao Ma	Euthyroidism	N	38	F	163.5	56.5	21.1	80.41	21	113	1.18	2.47	1.12									1.1818
Qiang Zhang	Euthyroidism	N	36	F	165	70.5	25.9	27.39	68	284	3.06	3.38	1.2	21	16	14	5.87	5.11	1.73	1.29	3.28	1.20294
Fei Wei	Euthyroidism	N	43	F	167	65	23.3	23.55	30	121	1.74	3.34	0.98	25	26	16	4.63	4.58	0.95	1.95	2.48	1.35156
Yan Ma	Euthyroidism	N	68	F	156.5	51.8	21.1	50.58	68	163	2.64	3.08	0.93	43	40	86	4.15	5.72	3.31	1.22	2.94	1.57919
Lian Li	Euthyroidism	N	51	F	159.5	51.2	20.1	71.07	33	124	2.4	2.55	1.2	14	22	6	4.45	5.84	1.01	2.39	3.08	1.19519
Xue Zhu	Euthyroidism	N	39	M	180	62.8	19.4	5.31	48	94	1.64	3	1.41	12	17	18	4.25	6.31	1.18	1.49	4.64	1.54262
Zhi Qian	Euthyroidism	N	35	F	166.5	51.2	18.5	7.44	61	125	2.49	3.48	1.38				4.26	6.81	0.9	1.9	4.22	2.6692
Lu Wang	Euthyroidism	N	55	F	158	48.9	19.4	201.98	29	90	1.61	2.97	1.13	17	25	16	4.35	4.23	0.69	1.5	2.28	1.81887
Su Zhan	Euthyroidism	N	45	F	176	63.8	20.6	0.01	22	125	1.32	3.08	1.31	12	18	15	4.44	4.68	0.93	1.54	2.88	2.3958
Wen Xu	Euthyroidism	N	53	F	160	55.1	21.5	13.33	67	175	1.4	3.02	1.06	17	20	9	4.5	3.87	1.59	1.25	2.7	1.33704
Gong Jin	Euthyroidism	Y	45	M	171	71.7	24.5	5.38	89	177	3.78	3.5	1.02	42	22	30	5.91	5.58	2.45	1.32	3.75	1.68613
Jian Yu	Euthyroidism	Y	43	F	181.5	82.9	25.2	2.99	83	234	1.47	3.67	1.4	15	18	14	4.53	3.62	0.86	1.44	1.77	0.939976
He Cai	Euthyroidism	Y	33	M	162.5	70	26.5	5.17	82	190	3.16	3.7	1.39	115	47	29	3.6	6.02	0.92	1.32	4.6	1.9483
Shao Wei	Euthyroidism	Y	39	M	168	67.9	24.1	6.48	71	160	1.78	3.26	1.3	26	22	22	4.98	6.92	2.25	1.15	4.49	2.00828
Yu Shen	Euthyroidism	Y	30	F	168	72.5	25.7	4.67	80	222	1.32	3.58	1.06	34	34	93	4.88	5.82	1.76	1.12	4.22	1.35886
Zhu Xin	Euthyroidism	Y	34	F	165.5	61.2	22.3	1.8	42	218	0.68	2.4	1.5	15	18	11	4.24	7.19	0.66	0.87	6.5	0.96586
Chu Ai	Euthyroidism	Y	33	F	164.5	76.9	28.4	4.96	76	226	2.38	3.41	1.13	33	25	27	4.27	5.11	1.05	1.54	3.61	1.89285
Chun Yan	Euthyroidism	Y	48	F	153.5	62.6	26.6	9.95	80.3	71	1.85	2.66	0.94	14	22	11	4.13	5.02	1.27	1.41	3.43	2.62898
Lin Gan	Euthyroidism	Y	41	F	162	77.4	29.5	300	81	270	4.37	3.4	1.2	26	20	13	3.99	4.35	1.26	1.31	2.81	2.38106
Cun Zhang	Euthyroidism	Y	59	F	155.5	58.2	24.1	7.65	88	166	3.07	2.97	0.99	16	17	10	4.84	4.63	1.11	1.23	2.91	1.72196
Li Dong	Euthyroidism	Y	47	F	155	66	27.5	7.57	76	267	3.41	3.36	1.09	18	19	18	3.9	4.4	1.2	1.75	2.61	2.40697
Yun Li	Euthyroidism	Y	36	M	184.5	82	24.1	4.88	74	237	0.95	3.35	1.18	15	18	23	4.78	4.24	1.84	1.1	2.77	2.38867
Yun Feng	Euthyroidism	Y	42	F	171	78.8	26.9	14.3	106	211	1.29	3.82	8.2	15	15	25	4.6	4.69	1.44	1.32	3.22	2.01326
Wei Yan	Euthyroidism	Y	41	F	183	83.4	24.9	7.74	77	172	1.87	3.51	1.41	24	20	21	5.35	5.36	0.86	1.34	3.58	1.37818
Qing Yang	Euthyroidism	Y	58	F	154	62.6	26.4	4.14	67	261	1.49	3.44	1.21	56	34	67	4.3	4.93	0.96	1.38	3.9	0.870479
Wan Dai	Euthyroidism	Y	45	M	175	76.5	25	14.48	95	180	2.28	4.33	1.26	39	32	46	4.81	4.98	2.67	0.91	3.33	1.64913

## Sheet: NAFLD
Name	Group	Age	Gender	Height	Weight	BMI	IL-27	Visceralfat	Subcutaneousfat	s-TSH	FT3	FT4	ALT	AST	GGT	FBG	TC	TG	HDLC	LDLC	HOMARI3
Huang	hypothyroidism	51	F	159	58.7	23.2	13.65	44	140	63.13	2.19	0.38	15	17	15	4.93	6.65	1.53	1.7	4.48	1.18
YuMa	hypothyroidism	32	F	160	60	23.4	17.23	62	179	67.73	2.27	0.49	17	20	12	4.79	5.8	1.55	1.52	4.05	2.64
Zhuang	hypothyroidism	48	F	155.5	67.6	28	198.2	66	279	15.32	3.4	0.79	26	37	18	5.86	4.83	1.03	1.63	2.7	3.26
Mei Sun	hypothyroidism	47	F	157	64.1	26	35.23	77	174	63.43	1.33	0.26	12	25	27	6.43	4.83	3.26	1.25	2.16	3.94
He Zong	hypothyroidism	55	F	167	80	28.7	9.62	79	305	1.12	3.11	1.44	8	15	10	5.53	4.06	0.67	1.02	3.02	3.1
Yang	hypothyroidism	29	F	154.5	73.7	30.9	19.06	86	245		0.4	0.16	18	25	22	4.09	6.82	1.29	1.68	4.71	2.91
Ning	hypothyroidism	71	F	152.5	59.3	25.5	1.92	91	244	122.35	1.84	0.6	32	25	14	6.51	8.33	1.67	1.35	6.22	2.8
Bao Qian	hypothyroidism	58	M	182.5	86.4	25.9	9.57	92	200	94.04	1.26	0.33	50	43	46	4.2	7.97	1.98	1.13	4.9	1.55
Da Wang	hypothyroidism	50	F	170.5	73.9	25.4	16.78	92.4	98.6	51.82	2.77	0.63	52	25	33	5.31	6.27	2.02	1.19	4.08	1.63
Chen	hypothyroidism	41	F	154	64.2	27.1	76.88	94	255	60.03	0.92	0.23	42	32		5.4	6.1	1.31			1.99
Qin	hypothyroidism	41	F	173	85.7	28.6	13.11	94	231	106.75	2.58	0.72	18	16	12	4.73	6.08	0.77	1.47	4.33	1.74
Chun Zhang	hypothyroidism	66	F	150	58.2	25.9	13.32	101	235	3.99	2.83	1.46	19	20	14	5.11	3.66	2.62	1.41	1.65	1.89
Chen	hypothyroidism	63	M	162	65.8	25.1	123.68	105	241		2.11	0.4	22	25	29	4.38	5.37	1.63	1.27	4.19	1.28
Yu Qin	hypothyroidism	50	F	161	73.4	28.7	10.57	108	236												1.73
Shu Xu	hypothyroidism	58	F	157	76.1	30.9	7.78	109	303												2.73
Sun	hypothyroidism	71	F	152.5	59.3	25.5	3.91	91	244	122.35	1.84	0.6	32	25	14	6.51	8.33	1.67	1.35	6.22	2.8
Jin Chen	hypothyroidism	58	F	165	76.5	28.1	15.37	112	316	7.79	3.17	0.87	17	22	15	4.34	4.18	0.94	1.36	2.61	1.6
Chun Wang	hypothyroidism	31	F	168.5	93	32.8	10.56	113	269	11.53	2.86	0.81	23	26	31	3.7	3.99	2.26	0.78	2.53	2.37
Huang	hypothyroidism	47	F	152	70.4	30.5	13.74	114	300	111.48	0.67	0.19	37	40	23	4.74	7.87	1.66	2.5	3.03	1.14
Qin	hypothyroidism	57	F	159.5	66.3	26.1	23.56	121	230	12.07	3.17	0.88	27	46	78	5.91	3.78	1.58	1.27	2.14	2.84
Ze Jia	hypothyroidism	52	M	164.5	75.7	28	7.63	124	212												2.73
Jun Li	hypothyroidism	40	M	181	95.2	29.1	7.62	127	296		2.49	0.58	20	21	43	4.34	5.93	2.76	1.03	4.3	3.6
Zhang	hypothyroidism	50	M	169.5	86.2	30	19.24	131	239	15.24	3.34	0.86	81	39	39	5.2	6.01	2	1.24	3.92	1.92
Wen Liu	hypothyroidism	46	M	169.5	91.9	32	9.76	135	244	69.19	3.08	0.89	10	19	21	4.44	4.93	1.92	1.03	3.17	2.33
Xiu Yang	hypothyroidism	68	F	155	76.1	31.7	11.23	150	253	139.79	2	0.42	33	31	46	5.31	5.59	3.41	0.85	3.82	2.96
Qiang Gao	hypothyroidism	58	M	174.5	98.4	32.3	16.57	167	323												3.73
Li Li	hypothyroidism	40	F	155.5	97.7	40.4	9.55	179	330	5.08	2.88	1.34	26	22	24	5.23	4.1	1.7	0.89	2.69	2.91
Dong Liu	hypothyroidism	41	M	171	99.6	34.1	7.68	196	311	67.91	2.78	0.92									3.23
Meng Cai	Subclinical hypothyroidism	50	F	170	60.4	20.9	39.25	55	181	6.57	2.9	0.99	18	22	25	4.22	5.02	0.69	1.6	3.41	3.54
Hong Jin	Subclinical hypothyroidism	51	F	165	68.6	25.2	14.86	66	158	7.04	2.43	0.97	29	24	32	5.14	6.44	2.28	1.53	4.64	4.73
Chen Cai	Subclinical hypothyroidism	40	F	167	78.9	28.3	26.46	80	269	3.56	3.49	1.24	13	14	21	5.25	4.15	0.99	1.35	2.41	3.36
Sun	Subclinical hypothyroidism	31	F	168.5	73.9	26	11.68	82	260	12.74	3.19	1.1	21	20	20	5.09	6.48	2.26	1.18	5.07	2.77
Ying Wu	Subclinical hypothyroidism	63	F	157.5	57.6	23.2	37.63	85	210	6.48	2.99	1.13	25	23	22	4.53	5.25	4.12	1.09	2.47	3.12
Sheng Jia	Subclinical hypothyroidism	38	M	170	71.9	24.9	10.5	92	245	5.36	3.94	1.5	38	29	37	5.75	6	2.49	1.12	4.6	2.58
Shu Li	Subclinical hypothyroidism	72	F	155	57.1	23.81	9.7	94	135	7.52	3.5	1.14	13	20	35	5.09	5.12	2.07	1.16	3.34	3.1
Yue Liu	Subclinical hypothyroidism	47	F	161.5	60.4	23.2	96.78	96	196	49.1	2.55	0.91	40	26	35	4.92	7.69	4.4	1	4.64	1.82
Hong Wu	Subclinical hypothyroidism	41	F	153	75.1	32.1	7.12	98	299	11.44	3.4	1.11	13	27	24	3.93	3.99	1.6	1.33	1.76	1.82
Peng Zhang	Subclinical hypothyroidism	34	M	171.5	66.8	22.7	28.69	100	192	6.95	3.63	1.42	15	20	19	4.93	4.22	1.63	0.76	2.69	1.82
Peng Wang	Subclinical hypothyroidism	48	F	162.5	62.9	23.8	127.93	107	142	8.03	3.5	1.23	51	32	34	6.42	8.39	2.69	1.12	6.97	6.05
Chen Cai	Subclinical hypothyroidism	40	F	167	78.9	28.3	22.39	80	269	3.56	3.49	1.24	13	14	21	5.25	4.15	0.99	1.35	2.41	3.36
Feng	Subclinical hypothyroidism	58	F	160.5	78.7	30.6	11.35	119	331	6.21	3.45	1.33				5.29	4.11	1.37	1.34	2.21	2.71
Bo Zhao	Subclinical hypothyroidism	33	M	170.5	90.5	31.1	12.56	127	306	5.29	3.98	1.33	79	39	62	4.12	5.38	1.64	1.16	3.91	4.07
Sun	Subclinical hypothyroidism	33	M	179.5	92.2	28.6	15.23	148	270	12.54	3.36	1.27	20	22	25	5.1	4.53	1.12	1.36	2.88	2.98
Li Shao	Subclinical hypothyroidism	52	F	159	85.9	34	11.16	167	327	5.55	2.94	1.21	28	24	13	3.88	4.59	1.35	1.83	2.59	1.81
Yue Liu	Subclinical hypothyroidism	47	F	161.5	60.4	23.2	24.66	96	196	49.1	2.55	0.91	40	26	35	4.92	7.69	4.4	1	4.64	1.82
Peng Zhang	Subclinical hypothyroidism	34	M	171.5	66.8	22.7	22.6	100	192	6.95	3.63	1.42	15	20	19	4.93	4.22	1.63	0.76	2.69	1.82
Xing	Subclinical hypothyroidism	52	F	158	88.7	35.5	10.27	170	358	5.32	3.26	1.1	19	21	24	6.65	5.2	2.04	1.49	3.49	3.36
Xiao Yin	Subclinical hypothyroidism	72	M	173.5	88.5	29.4	6.96	227	221	10.34	2.77	0.98	32	31	15	4.92	4.69	1.14	0.98	3.23	2.27

## Sheet: N-NAFLD
Name	Group	Age	Gender	Height	Weight	BMI	IL-27	Visceralfat	Subcutaneousfat	s-TSH	FT3	FT4	ALT	AST	GGT	FBG	TC	TG	HDLC	LDLC	HOMARI3
Si Chen	hypothyroidism	35	F	162.5	56.8	21.5	128.23	13	65	73.29	1.91	0.62	23	29	29	4	6.3	1.69	2.21	3.06	0.37
Zhen Guo	hypothyroidism	27	F	161.5	53.2	20.4	133.56	22	163	74.76	2.45	0.54	12	20	11	4.59	4.9	0.9	1.89	2.77	1.7
Hai Sun	hypothyroidism	46	F	155.5	39.4	16.3	139.53	25	40	104.89	2.21	0.47	11	13	8	4.16	5.54	0.63	2.05	3.1	0.35
Wang	hypothyroidism	35	F	160	49.7	19.4	135.57	27	144	105.31	2.26	0.77	11	16	11	4.46	5.13	0.62	2.04	2.89	0.69
Li Wu	hypothyroidism	40	F	159	58.1	23	119.92	27	191	150	1.66	0.43	14	19	7	4.4	7.47	1.61	1.55	5.26	1.63
Yuan	hypothyroidism	47	M	159	58.7	23.2	118.79	30	173	111.48	2	0.61	20	20	35	4.84	5.17	0.72	1.79	2.94	0.95
Jie Zhang	hypothyroidism	36	F	163	56.3	21.2	131.35	30	145	17.74	1.2	0.15	17	23	12	4.15	6.01	1.47	1.56	4.33	1.27
Yuan Tian	hypothyroidism	39	F	152.5	49.4	21.1	131.36	31	131	9.27	2.86	0.98	13	20	13	4.51	5.71	1.28	2.12	3.04	1.67
Xin He	hypothyroidism	23	F	168	51.2	18.1	109.01	32	83	0.39	2.97	1.22	10	13	9	4.09	3.2	0.79	1.12	1.53	1.51
Ma	hypothyroidism	33	F	164.5	54.3	20.1	156.2	34	160	18.66	3.12	0.81	13	23	9	4.29	4.52	0.6	1.74	2.66	0.48
Zhou	hypothyroidism	36	F	160.5	52.3	20.3	119.13	36	126		2.23	0.57	10	22	10	5.21	4.64	0.91	1.71	2.04	1.83
Lu	hypothyroidism	40	F	176	56.5	18.2	118.04	38	142	35.22	3.08	0.67	11	14	16	4.24	5.04	0.6	1.8	3.04	1.38
Qin Wang	hypothyroidism	45	F	154	59.9	25.3	103.28	39	225	15.92	2.7	0.65	27	25	14	4.56	5.82	1.04	1.76	3.88	1.68
Liu	hypothyroidism	34	F	162.5	53.5	20.3	137.49	43	111	82.68	0.65	0.1	62	55	48	3.94	8.16	1.6	2.88	4.51	0.93
Min Deng	hypothyroidism	30	F	155.5	48.5	20.1	132.38	43	87	135.39	0.39	0.1	67	60	25	4.34	6.22	1.02	1.79	4.52	1.6
Liu	hypothyroidism	38	F	164.5	44.2	16.3	138.84	45	66	8.34	2.47	0.87	44	95	322	4.01	5.59	3.28			0.45
Ying Shi	hypothyroidism	54	F	158.5	58.5	23.4	126.58	45	170	5.28	2.97	1.3	25	23	14	4.51	4.78	0.73	1.64	2.76	1.67
Xiao Wang	hypothyroidism	67	F	159	50.9	20.1	133.19	50	128	6.23	2.67	1.51	12	15	12	4.69	4.79	0.73	1.79	2.6	1.23
Yu Yang	hypothyroidism	62	F	151.5	60	26.1	136.38	51	303	3.12	3.01	1.3	26	25	23	4.59	6.91	3.97	1.41	3.22	1.7
Mei Jiang	hypothyroidism	36	F	158	55.9	22.4	121.79	52	151	85.35	2.54	0.72	95	91	14	4.54	5.33	0.82	1.42	3.68	0.93
Na Zu	hypothyroidism	32	F	168.5	68.5	24.1	131.39	53	270												1.73
Shang	hypothyroidism	36	F	164	64.4	23.9	67.25	54	139	81			11	15	6	4.25	6.19	1.03	1.68	4.39	0.83
Jian Liu	hypothyroidism	46	F	173.5	75.2	25	99.31	56	234	36.53	2.27	0.75	16	19	15		4.95	4.82	1.68	2.88	1.73
Li Cheng	hypothyroidism	59	F	166.5	61.6	22.2	130.23	59	167	0.56	3.6	1.73	23	28	12	4.48	5.38	2.12	1.14	3.12	0.94
Ning Zhang	hypothyroidism	29	F	166.5	55.3	19.9	32.57	59	123		1.41	0.22	38	34	19	4.28	6.58	1.71	1.8	3.82	1.03
Jin Zhao	hypothyroidism	42	M	179.5	78.5	24.4	122.35	63	155	4.35	3.37	1.46	31	24	18	5.14	6.36	1.57	1.12	4.5	1.9
Lu	hypothyroidism	31	F	170	68.6	23.7	133.91	68	209	2.31	0.96	0.21	37	69	24	3.75	10.14	1.84	2.83	7.2	1.62
Liang	hypothyroidism	46	F	164	70	26	118.33	72	236	77.11	1.53	0.23	12	22	11	4.48	6.81	0.92	2.04	4.3	0.84
Su Guan	hypothyroidism	64	F	157	66.7	27.1	156.21	72	277	89.97	1.95	0.61									1.73
Jin Ma	hypothyroidism	49	F	162.5	65.3	24.7	6.59	72	145	1.65	2.64	1.14	34	26	24	6.85	4.31	0.73	1.46	2.34	2.53
Li	hypothyroidism	53	M	166.5	58.6	21.1	129.64	72.5	96.5	126.6	2.94	0.64	18	17	16	4.31	5.66	1.55	1.38	3.6	0.92
Zhao	hypothyroidism	42	F	160	71.8	28	178.39	75	279	10	2.92	0.77	39	32	59	4.1	4.55	0.79	1.57	2.95	1.29
Yan Dou	hypothyroidism	46	F	154	55.1	23.2	129.56	77	153	18.05	2.27	0.77									1.73
Li Zhu	hypothyroidism	44	F	153.5	62.5	26.5	101.26	82	171	20.5	3.69	0.72	12	14	12	4.46	4.97	1.63	1.18	3.34	2.52
Bao	hypothyroidism	65	F	156	64.5	26.5	130.16	84	220	180.4	3.31	4.7	48	42	197	1.7	6.56	1.42	2	3.79	0.66
Ji Du	hypothyroidism	51	F	160.5	65.3	25.3	119.37	85	186	48.73	2.5	0.52	19	24	10	4.89	5.52	0.59	1.96	3.45	1.81
Wei Zheng	hypothyroidism	61	F	181.5	69.5	21.1	131.35	85	221	69.12	2.06	0.57	14	20	18	4.79	5.1	0.81	1.97	2.52	1.77
Wang	hypothyroidism	35	F	160	49.7	19.4	139.8	27	144	105.31	2.26	0.77	11	16	11	4.46	5.13	0.62	2.04	2.89	0.69
Hong Yu	hypothyroidism	54	F	156.5	59.1	24.1	189.73	86	196	110.52	2.18	0.39	34	30	20	5.12	5.68	1.59	1.41	3.57	1.87
Rui Zhou	hypothyroidism	29	F	158	71.1	28.5	113.95	86	299	27.1	2.8	0.72	42	28	29	5.14	2.52	0.91	1.02	3.4	1.9
Wang	hypothyroidism	35	F	160	49.7	19.4	129.68	27	144	105.31	2.26	0.77	11	16	11	4.46	5.13	0.62	2.04	2.89	0.69
Bao Xuan	hypothyroidism	53	M	165.5	71.8	26.2	110.54	86	175		1.56	0.16	16	26	25	4.59	5.66	1.48	1.45	2.98	1.7
Lu	hypothyroidism	53	F	162	68.1	25.9	121.71	87	224	142.63	0	0.1	27	52	20	4.17	7.49	2.09	1.79	4.92	1.2
Shu Hu	hypothyroidism	49	M	163.5	72	26.9	180.63	87	198	70.97	0.86	0.17	76	60	362	5.27	5.06	2.1	1.38	1.49	1.31
Fu Shu	hypothyroidism	35	M	166.5	79.3	28.6	125.21	89	249	47.9	1.86	0.53	26	16	70	4.89	4.69	2.44	1.06	2.44	1.81
Li Fan	hypothyroidism	47	F	154.5	62	26	7.69	92	179	9	2.97	0.8	14	14	6	5.18	3.93	0.71	1.11	2.49	1.91
Zhang	hypothyroidism	32	M	187.5	83.9	23.9	130.24	93	176		2.25	0.53	28	18	17	4.54	4.38	0.93	1.46	2.69	1.94
Jia Gao	hypothyroidism	31	M	184.5	86.5	25.4	166.79	95	228	29.02	3.3	1.04	19	18	14	4.87	7.76	2.54	1.15	5.29	1.8
Liu	Subclinical hypothyroidism	37	F	166.5	65	23.4	156.93	16	178	6.09	3.45	1.48	15	15	8	4.53	5.35	1.77	2.59	2.22	0.95
Ying Zhang	Subclinical hypothyroidism	32	F	158	47.3	18.9	118	17	78	5.5	3.44	1.3	12	17	11	4.74	4.66	0.72	1.29	3.2	1.62
Wang	Subclinical hypothyroidism	55	F	153	48.8	20.8	162.21	17	178	9.59	1.93	0.69	19	22	12	5.93	3.25	0.69	1	1.85	1.43
Yu Su	Subclinical hypothyroidism	26	F	159	52.4	20.7	133.83	22	178	4.81	3.38	1.13	14	18	15	3.75	3.63	0.97	1.51	2.08	1.93
Chen Zheng	Subclinical hypothyroidism	37	F	155.5	46.1	19.1	214.58	25	166	6.18	3.52	1.25	19	22	14	4.18	4.78	0.74	2.19	2.58	1.3
Jing Xu	Subclinical hypothyroidism	33	F	160	46.4	18.1	162.12	29	126	6.25	3.54	1.29	10	16	12	4.43	4.57	0.88	1.51	3.03	0.65
Ying Zhang	Subclinical hypothyroidism	32	F	158	47.3	18.9	262.03	17	78	5.5	3.44	1.3	12	17	11	4.74	4.66	0.72	1.29	3.2	1.62
Xiao Shi	Subclinical hypothyroidism	24	F	177.5	63.3	20.1	300	31	196	14.95	3.17	1.16	14	17	11	4.31	6.67	1.28	1.45	4.5	1.59
Yu Qin	Subclinical hypothyroidism	55	F	165	59.7	21.9	27.31	33	223	6.37	2.91	1	17	21	10	4.14	4.18	1.47	1.34	2.49	0.46
Zeng	Subclinical hypothyroidism	29	M	163.5	69.5	26	139.79	37	289	4.82	2.78	1.23	19	20	15	4.67	5.75	1.72	1.06	4.12	1.87
Xiao Zhang	Subclinical hypothyroidism	29	F	163	52.8	19.9	127.44	41	136	6.75	3.39	1.13	9	17	16	4.9	3.3	1.15	0.99	1.96	1.81
Jing Geng	Subclinical hypothyroidism	35	F	165.5	54.5	19.9	126.83	42	175	6.48	3.4	1.12	14	21	11	4.21	4.87	0.66	1.58	2.74	0.97
Zhang	hypothyroidism	32	M	187.5	83.9	23.9	126.24	93	176		2.25	0.53	28	18	17	4.54	4.38	0.93	1.46	2.69	1.94
Gao	Subclinical hypothyroidism	51	F	151.5	51.9	22.6	118.33	42	170	126.12	0.46	0.15	46	59	18	4.87	8.83	1.77	2.48	5.09	0.52
Li Sun	Subclinical hypothyroidism	28	F	159	50.8	20.1	152.64	43	116	20.8	3.1	0.96	19	26	17	3.75	4.3	1.42	1.58	2.06	0.42
Yi Luan	Subclinical hypothyroidism	28	F	161.5	72.1	27.6	116.25	43	201	7.06	3.24	1.19	13	17	12	5.1	3.38	0.45	1.66	1.32	1.75
Xiao Shi	Subclinical hypothyroidism	24	F	177.5	63.3	20.1	111	31	196	14.95	3.17	1.16	14	17	11	4.31	6.67	1.28	1.45	4.5	1.59
Yu Qin	Subclinical hypothyroidism	55	F	165	59.7	21.9	22.34	33	223	6.37	2.91	1	17	21	10	4.14	4.18	1.47	1.34	2.49	0.46
Mei Chen	Subclinical hypothyroidism	40	F	163	56.4	21.2	9	46	143	14.17	2.38	0.98	6	15	8	4.3	1.79	0.85	1.79	2.79	0.69
Zheng	Subclinical hypothyroidism	48	F	158.5	51.3	20.4	173.28	46	161	5.54	2.77	0.9	10	14	8	4.62	4.91	0.68	1.72	2.93	0.82
Xue Wei	Subclinical hypothyroidism	53	F	156	58.5	24	159.55	48	172	0.02	5.28	1.74	56	45	13	4.29	4.61	0.95	1.47	2.74	1.58
Jin He	Subclinical hypothyroidism	33	F	155	59.3	24.7	116.27	49	171	5.15	3.53	1.13	13.3	18.9	10.1	5.61	4.22	1.25	1.08	2.1	2.07
Feng Li	Subclinical hypothyroidism	62	F	157.5	53.7	21.6	6.95	54	186	9.95	3.41	0.93	8.8	20	11.2	5.42	4.99	1.05	1.48	2.76	2
Yan liu	Subclinical hypothyroidism	52	F	163.5	68	25.4	137.07	54	273	5.94	2.97	1.26									1.38
Jing Geng	Subclinical hypothyroidism	35	F	165.5	54.5	19.9	119.87	42	175	6.48	3.4	1.12	14	21	11	4.21	4.87	0.66	1.58	2.74	0.97
Hao	Subclinical hypothyroidism	42	F	165.5	63	23	13.87	62	270	5.22	3.5	1.1	35	38	19	5.78	6.26	2.18	1.31	4.3	2.36
Qiao Wang	Subclinical hypothyroidism	59	F	157	62.5	25.4	171.75	70	244	11.43	3.21	0.97	31	28	17	4.53	5.52	2.36	1.02	3.54	2.84
Dan Liu	Subclinical hypothyroidism	40	F	167.5	65.4	23.3	132	75	135	6.24	2.89	0.98	27	20	15	4.11	4.3	1.68	1.13	2.58	1.92
Jia Wu	Subclinical hypothyroidism	34	F	162	76.8	29.3	24.77	76	298	4.97	3.27	0.99	16	18	57	5.18	5.51	1.06	1.43	3.96	1.77
Shu Yang	Subclinical hypothyroidism	62	F	165	66.6	24.5	13.35	77	198	10.58	2.52	0.98	18	22	18	4.96	7.35	1.59	1.5	4.74	1.83
Wu	Subclinical hypothyroidism	58	F	154	53.8	22.7	110.32	84	172	9.96	3.15	1.15	30	35	34	5.82	3.97	3.67	0.9	0.99	1.39
Jing Fang	Subclinical hypothyroidism	45	F	164	68.2	25.4	131.43	88	97.5	4.87	3.09	1.09	30	27	12	4.7	7.18	2.31	1.17	4.85	1.5
Dan Ma	Subclinical hypothyroidism	41	F	164	50.6	18.8	110.01	95	399	9.95	2.98	1.15	7	18	19	4.26	3.91	0.83	1.18	2.58	0.93
Shu Yang	Subclinical hypothyroidism	62	F	165	66.6	24.5	13.46	77	198	10.58	2.52	0.98	18	22	18	4.96	7.35	1.59	1.5	4.74	1.83
